# Supplementary material for: Catalytic conversion to ammonia through solid-state nitrate as a proposal for the emerging usage of nitrogen oxides
Source: Royal Society of Chemistry journal article supplement (doi:10.1039/d3cy00169e), 2023-01-01
Supplement: d3cy00169e1.pdf [file d3cy00169e1.pdf]

## Supporting information

### **Catalytic conversion to ammonia through solid-state nitrate as a proposal for emerging usage of nitrogen oxides**

Atsuko Tomita, Ryutaro Wakabayashi and Tatsuo Kimura\*

National Institute of Advanced Industrial Science and Technology (AIST),  
Sakurazaka, Moriyama-ku, Nagoya 463-8560, Japan.

\*e-mail: [t-kimura@aist.go.jp](mailto:t-kimura@aist.go.jp)

**Table S1** Structural features of AEM/PGM@mAl<sub>2</sub>O<sub>3</sub> type nanocomposite catalysts.

| Nanocomposite catalyst<br>/ mass ratio                       | Amount of<br>Pt NPs<br>/ mass % | Specific<br>surface area<br>/ m <sup>2</sup> g <sup>-1</sup> | Total pore<br>volume<br>/ cm <sup>3</sup> g <sup>-1</sup> | Pore<br>diameter<br>/ nm | Size, ave. PGM NPs<br>/ nm |                                         |
|--------------------------------------------------------------|---------------------------------|--------------------------------------------------------------|-----------------------------------------------------------|--------------------------|----------------------------|-----------------------------------------|
|                                                              |                                 |                                                              |                                                           |                          | TEM                        | XRD                                     |
| $\gamma$ -Al <sub>2</sub> O <sub>3</sub>                     | -                               | -                                                            | -                                                         | -                        | -                          | -                                       |
| 10Ba/1.00Pt/100 $\gamma$ -Al <sub>2</sub> O <sub>3</sub>     | 0.90                            | -                                                            | -                                                         | -                        | 13                         | 17                                      |
| 1.00Pt@100mAl <sub>2</sub> O <sub>3</sub> ( $\gamma$ )       | -                               | 200                                                          | 0.35                                                      | 5.0                      | 22                         | 23                                      |
| 10Ba/1.00Pt@100mAl <sub>2</sub> O <sub>3</sub> ( $\gamma$ )  | -                               | 180                                                          | 0.32                                                      | 5.0                      | 21                         | 25                                      |
| 10Ba/1.00Pd@100mAl <sub>2</sub> O <sub>3</sub> ( $\gamma$ )  | -                               | 190                                                          | 0.44                                                      | 7.5                      | 51                         | 15 (PdO)                                |
| 10Ba/1.00Ir@100mAl <sub>2</sub> O <sub>3</sub> ( $\gamma$ )  | -                               | 190                                                          | 0.33                                                      | 5.1                      | >100                       | 32 (IrO <sub>2</sub> )                  |
| 10Ba/1.00Rh@100mAl <sub>2</sub> O <sub>3</sub> ( $\gamma$ )  | -                               | 230                                                          | 0.49                                                      | 5.8                      | 19                         | 15<br>(Rh <sub>2</sub> O <sub>3</sub> ) |
| 2.7Ca/0.93Pt@100mAl <sub>2</sub> O <sub>3</sub> ( $\gamma$ ) | 0.90                            | 180                                                          | 0.33                                                      | 4.2                      | 21                         | 22                                      |
| 4.0Ca/1.00Pt@100mAl <sub>2</sub> O <sub>3</sub> ( $\gamma$ ) | 0.95                            | 180                                                          | 0.32                                                      | 5.1                      | 22                         | 23                                      |
| 5.6Ca/0.96Pt@100mAl <sub>2</sub> O <sub>3</sub> ( $\gamma$ ) | 0.90                            | 150                                                          | 0.27                                                      | 4.2                      | 24                         | 20                                      |
| 7.2Ca/0.97Pt@100mAl <sub>2</sub> O <sub>3</sub> ( $\gamma$ ) | 0.90                            | 170                                                          | 0.26                                                      | 4.0                      | 21                         | 16                                      |
| 8.8Ca/0.99Pt@100mAl <sub>2</sub> O <sub>3</sub> ( $\gamma$ ) | 0.90                            | 140                                                          | 0.19                                                      | 3.5                      | 20                         | 15                                      |

**Table S2** Direct NH<sub>3</sub> synthesis in a flow of 1000 ppm NO with 1% H<sub>2</sub> by using typical nanocomposite catalysts.

|                                                              | Temperature / °C | NO<br>/ ppm | H <sub>2</sub> | NH <sub>3</sub> | N <sub>2</sub> | N <sub>2</sub> O | NO <sub>2</sub> |
|--------------------------------------------------------------|------------------|-------------|----------------|-----------------|----------------|------------------|-----------------|
| 1.00Pt/100 $\gamma$ -Al <sub>2</sub> O <sub>3</sub>          | 150 °C           | 0           | 7890           | 841             | 34             | 53               | 0               |
|                                                              | 200 °C           | 0           | 7840           | 899             | 27             | 23               | 0               |
|                                                              | 250 °C           | 0           | 7780           | 925             | 23             | 11               | 0               |
|                                                              | 300 °C           | 0           | 7790           | 941             | 20             | 0                | 0               |
|                                                              | 350 °C           | 0           | 7780           | 959             | 12             | 0                | 0               |
|                                                              | 400 °C           | 0           | 7790           | 967             | 8              | 0                | 0               |
|                                                              | 450 °C           | 0           | 7810           | 977             | 6              | 0                | 0               |
| 10Ba/1.00Pt@100mAl <sub>2</sub> O <sub>3</sub> ( $\gamma$ )  | 150 °C           | 0           | 8330           | 597             | 195            | 0                | 0               |
|                                                              | 200 °C           | 0           | 8200           | 722             | 144            | 0                | 0               |
|                                                              | 250 °C           | 0           | 7990           | 849             | 69             | 0                | 0               |
|                                                              | 300 °C           | 0           | 7880           | 912             | 51             | 0                | 0               |
|                                                              | 350 °C           | 0           | 7890           | 947             | 27             | 0                | 0               |
|                                                              | 400 °C           | 0           | 7970           | 933             | 28             | 0                | 0               |
|                                                              | 450 °C           | 0           | 7940           | 915             | 47             | 0                | 0               |
| 5.6Ca/0.96Pt@100mAl <sub>2</sub> O <sub>3</sub> ( $\gamma$ ) | 150 °C           | 0           | 8190           | 715             | 95             | 55               | 0               |
|                                                              | 200 °C           | 0           | 8010           | 866             | 63             | 0                | 0               |
|                                                              | 250 °C           | 0           | 7860           | 924             | 47             | 0                | 0               |
|                                                              | 300 °C           | 0           | 7860           | 959             | 34             | 0                | 0               |
|                                                              | 350 °C           | 0           | 7820           | 967             | 28             | 0                | 0               |
|                                                              | 400 °C           | 0           | 7830           | 973             | 28             | 0                | 0               |
|                                                              | 450 °C           | 0           | 7840           | 962             | 34             | 0                | 0               |

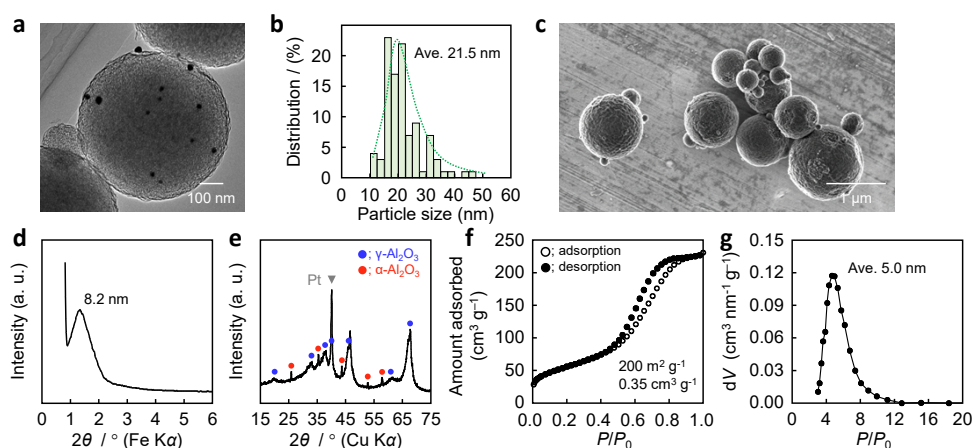

**Fig. S1** Characterization of 1Pt@mAl<sub>2</sub>O<sub>3</sub>( $\gamma$ ) prepared in one-pot by spray-drying a precursor solution for obtaining mAl<sub>2</sub>O<sub>3</sub> in the presence of Pluronic P123 with H<sub>2</sub>PtCl<sub>6</sub>; a) representative TEM image with b) resultant size distribution of Pt NPs, c) typical SEM image, d) low- and e) wide-angle XRD patterns and f) N<sub>2</sub> adsorption-desorption isotherm with g) corresponding pore size distribution curve.

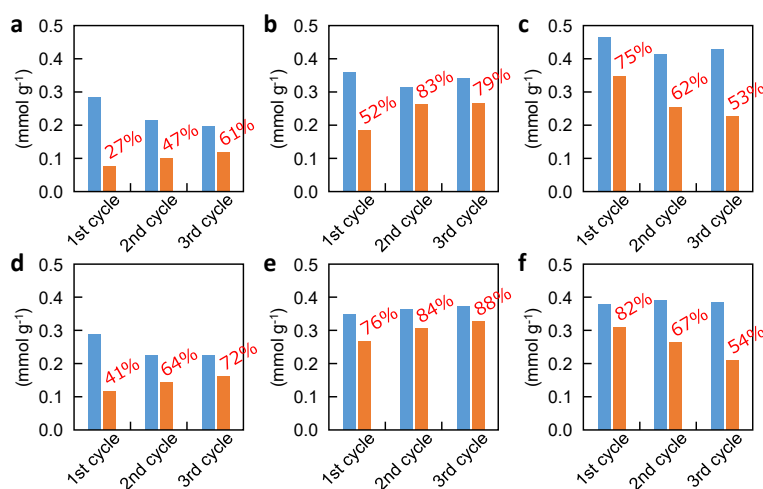

**Fig. S2** Amounts of ■ NO<sub>x</sub> storage and ■ NH<sub>3</sub> recovery of 10Ba/1Pt@mAl<sub>2</sub>O<sub>3</sub>( $\gamma$ ) with the selectivity to NH<sub>3</sub> during the operation cycles by alternate gas-switching between 1000 ppm NO with 10% O<sub>2</sub> and 1% H<sub>2</sub> at a) 200 °C, b) 250 °C, and c) 300 °C or 5% H<sub>2</sub> for NH<sub>3</sub> recovery at d) 200 °C, e) 250 °C, and f) 300 °C.

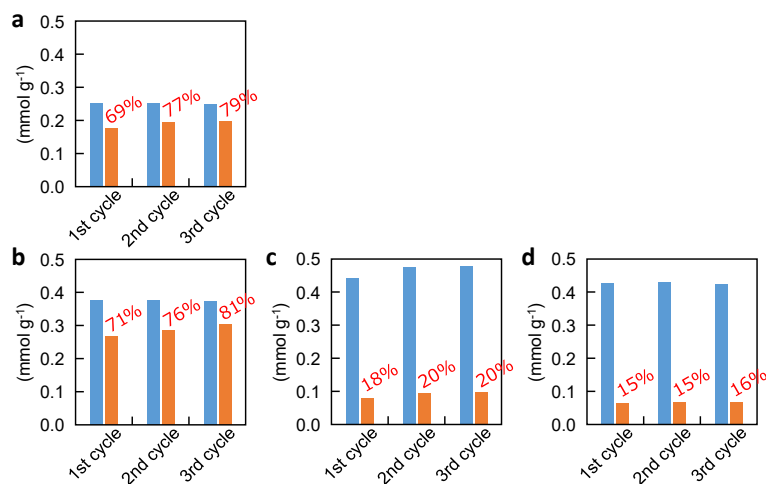

**Fig. S3** A preliminary study for  $\blacksquare$ NO<sub>x</sub> storage and  $\blacksquare$ NH<sub>3</sub> recovery by using a common 10Ba/1Pt/ $\gamma$ -Al<sub>2</sub>O<sub>3</sub> type catalyst, prepared through step-by-step impregnation of H<sub>2</sub>PtCl<sub>6</sub> and Ba(OOCCH<sub>3</sub>)<sub>2</sub> over a commercially available  $\gamma$ -Al<sub>2</sub>O<sub>3</sub>, with the selectivity to NH<sub>3</sub> during the operation cycles by alternate gas-switching between 1000 ppm NO with 10% O<sub>2</sub> and 1% H<sub>2</sub> at a) 175 °C, b) 200 °C, c) 250 °C and d) 300 °C.

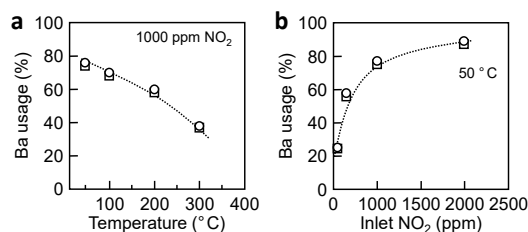

**Fig. S4** Direct NO<sub>2</sub> storage property of 10Ba/1Pt@mAl<sub>2</sub>O<sub>3</sub>( $\gamma$ ), being calculated as  $\circ$ BaCO<sub>3</sub> and  $\square$ BaO monolayers at the surface of mAl<sub>2</sub>O<sub>3</sub>( $\gamma$ ), during a) storage of NO<sub>2</sub> at different temperatures ranging from 300 °C down to 50 °C for 60 min in a flow of 1000 ppm NO<sub>2</sub> and b) that at 50 °C for 60 min in a flow of different NO<sub>2</sub> concentration from 300 ppm up to 2000 ppm.

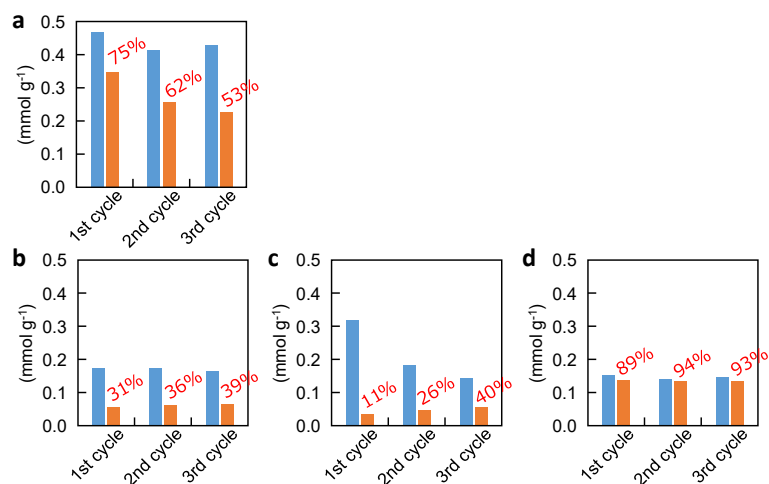

**Fig. S5** Amounts of  $\blacksquare$ NO<sub>x</sub> storage and  $\blacksquare$ NH<sub>3</sub> recovery with the selectivity to NH<sub>3</sub> by using a) 10Ba/1Pt@mAl<sub>2</sub>O<sub>3</sub>( $\gamma$ ), b) 10Ba/1Pd@mAl<sub>2</sub>O<sub>3</sub>( $\gamma$ ), c) 10Ba/1Ir@mAl<sub>2</sub>O<sub>3</sub>( $\gamma$ ) and d) 10Ba/1Rh@mAl<sub>2</sub>O<sub>3</sub>( $\gamma$ ) during the operation cycles at 300 °C by alternate gas-switching between 1000 ppm NO with 10% O<sub>2</sub> and 1% H<sub>2</sub>.

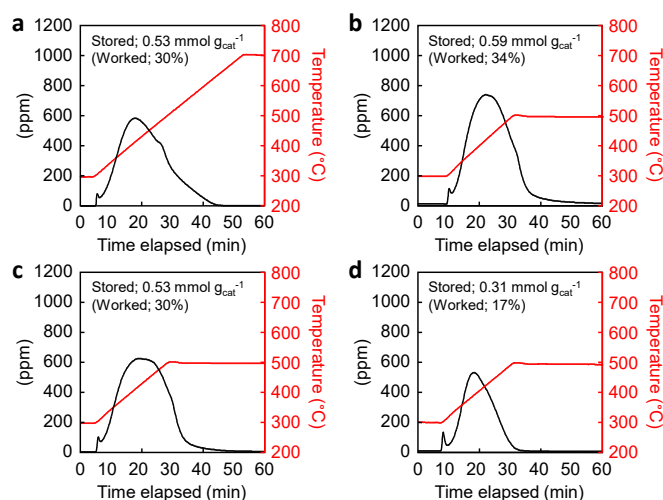

**Fig. S6** NO<sub>x</sub>-TPD profiles in a flow of 1000 ppm NO with 10% O<sub>2</sub> at 300 °C by using a) 10Ba/1Pt@mAl<sub>2</sub>O<sub>3</sub>( $\gamma$ ) and other catalysts such as b) Sr/1Pt@mAl<sub>2</sub>O<sub>3</sub>( $\gamma$ ), c) Ca/1Pt@mAl<sub>2</sub>O<sub>3</sub>( $\gamma$ ) and d) Mg/1Pt@mAl<sub>2</sub>O<sub>3</sub>( $\gamma$ ) during the heating from 300 °C up to 700 °C and/or 500 °C.

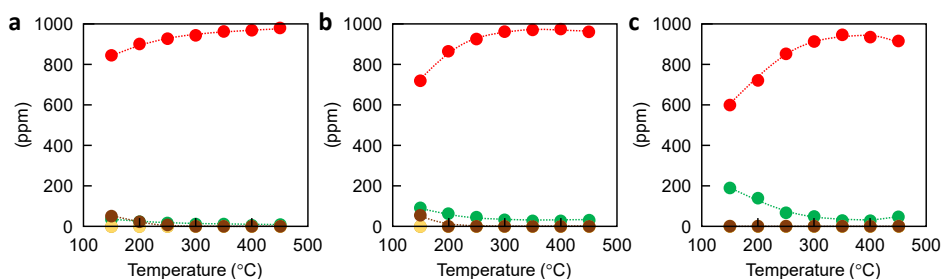

**Fig. S7** Direct catalytic conversion of NO with H<sub>2</sub> to nitrogen sources such as ●NH<sub>3</sub>, ●NO, ●NO<sub>2</sub>, ●N<sub>2</sub>O, and ●N<sub>2</sub> during the reaction in a flow of 1000 ppm NO with 1% H<sub>2</sub> by using a) 1Pt@mAl<sub>2</sub>O<sub>3</sub>( $\gamma$ ), b) 5.6Ca/0.96Pt@mAl<sub>2</sub>O<sub>3</sub>( $\gamma$ ) and c) 10Ba/1Pt@mAl<sub>2</sub>O<sub>3</sub>( $\gamma$ ) at temperatures ranging from 150 °C up to 450 °C.

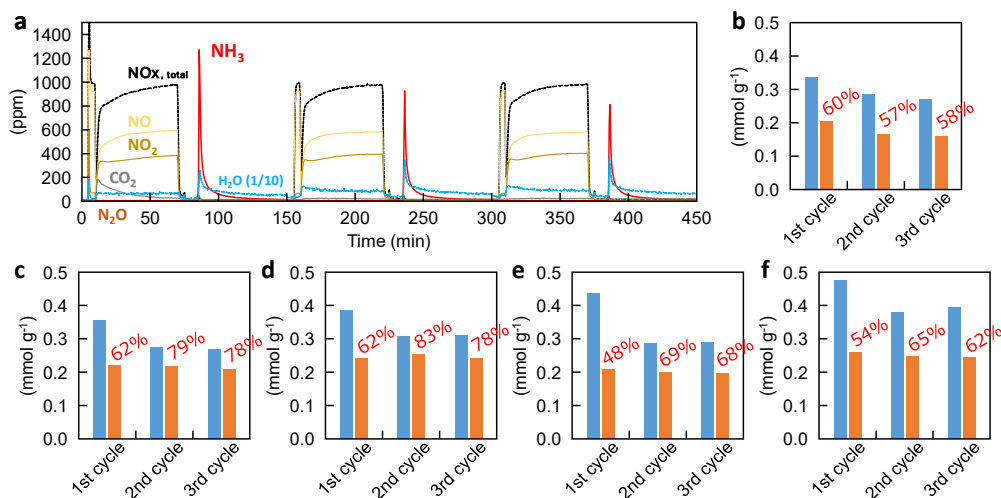

**Fig. S8** Amounts of ■NO<sub>x</sub> storage and ■NH<sub>3</sub> recovery with the selectivity to NH<sub>3</sub> by using a), b) 2.7Ca/0.9Pt@mAl<sub>2</sub>O<sub>3</sub>( $\gamma$ ) during the operation cycles at 300 °C by alternate gas-switching between 1000 ppm NO with 10% O<sub>2</sub> and 1% H<sub>2</sub> and those observed for c) 4.0Ca/1.0Pt@mAl<sub>2</sub>O<sub>3</sub>( $\gamma$ ), d) 5.6Ca/0.96Pt@mAl<sub>2</sub>O<sub>3</sub>( $\gamma$ ), e) 7.2Ca/0.97Pt@mAl<sub>2</sub>O<sub>3</sub>( $\gamma$ ) and f) 8.8Ca/0.99Pt@mAl<sub>2</sub>O<sub>3</sub>( $\gamma$ ).

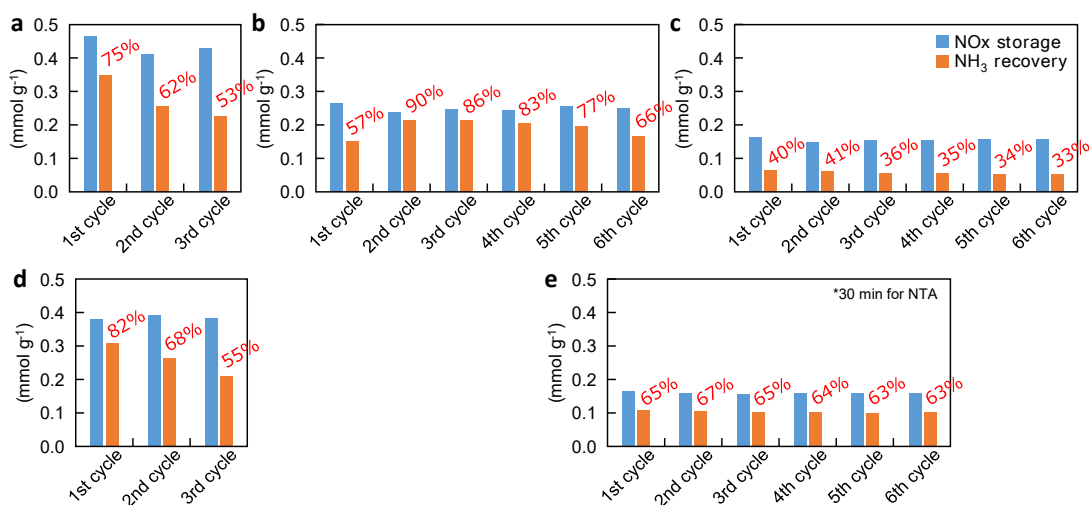

**Fig. S9** A case study for maximizing NH<sub>3</sub> recovery by using 10Ba/1Pt@mAl<sub>2</sub>O<sub>3</sub>( $\gamma$ ); amounts of ■NO<sub>x</sub> storage and ■NH<sub>3</sub> recovery with the selectivity to NH<sub>3</sub> during the operation cycles at 300 °C by alternate gas-switching between 1000 ppm NO with 10% O<sub>2</sub> and 1% H<sub>2</sub> when the reaction time was reduced from a) 60 min to b) 20 min and c) 15 min for each reaction or 5% H<sub>2</sub> when the reaction time was reduced from d) 60 min for each reaction to e) 15 min for NO<sub>x</sub> storage and 30 min for NH<sub>3</sub> synthesis.

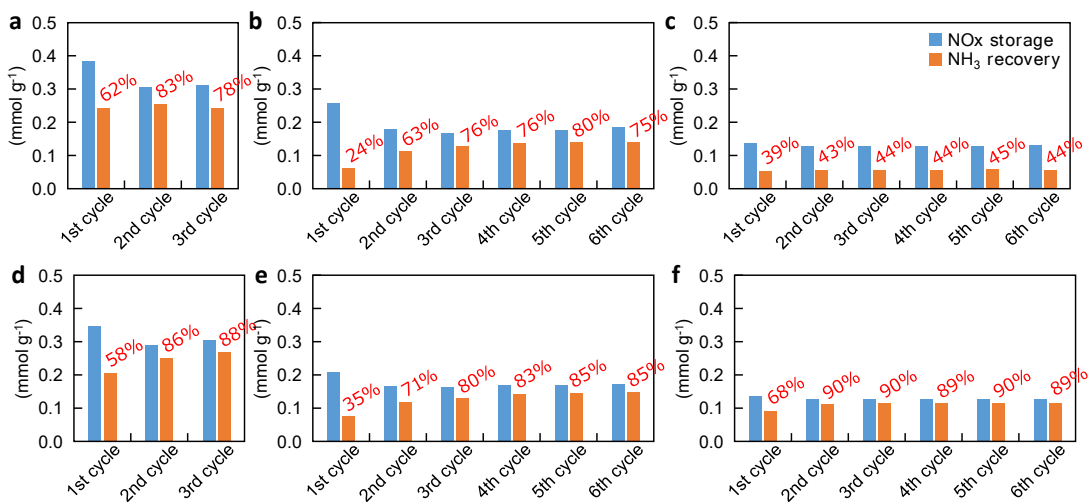

**Fig. S10** A case study for maximizing NH<sub>3</sub> recovery by using 5.6Ca/0.96Pt@mAl<sub>2</sub>O<sub>3</sub>( $\gamma$ ); amounts of ■NO<sub>x</sub> storage and ■NH<sub>3</sub> recovery with the selectivity to NH<sub>3</sub> during the operation cycles at 300 °C by alternate gas-switching between 1000 ppm NO with 10% O<sub>2</sub> and 1% H<sub>2</sub> when the reaction time was reduced from a) 60 min to b) 20 min and c) 15 min for each reaction or 5% H<sub>2</sub> when the reaction time was reduced from d) 60 min to e) 20 min and f) 15 min for each reaction.

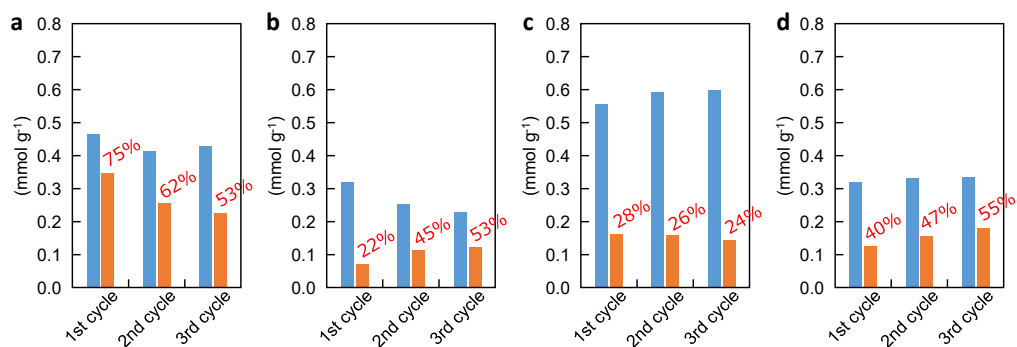

**Fig. S11** Amounts of ■NO<sub>x</sub> storage and ■NH<sub>3</sub> recovery with the selectivity to NH<sub>3</sub> by using 10Ba/1Pt@mAl<sub>2</sub>O<sub>3</sub>( $\gamma$ ) during the operation cycles at 300 °C for totally 120 min by alternate gas-switching between 1000 ppm NO with 10% O<sub>2</sub> a) without CO<sub>2</sub> and H<sub>2</sub>O, b) with 10% CO<sub>2</sub>, c) with 10% H<sub>2</sub>O, and d) with 10% CO<sub>2</sub> and 10% H<sub>2</sub>O for 60 min and 1% H<sub>2</sub> for NH<sub>3</sub> recovery.
